# Supplementary material for: Silk Fibroin-Sheathed Conducting Polymer Wires as Organic Connectors for Biosensors
Source: Biosensors (Basel). 2019 Aug 28;9(3):103. doi: 10.3390/bios9030103 (PMC6784353; doi:10.3390/bios9030103)
Supplement: Supplementary file 1 [file biosensors-09-00103-s001.pdf]

# Silk Fibroin-Sheathed Conducting Polymer Wires as Organic Connectors for Biosensors

Yanke Jiang <sup>1,2</sup>, Meng Xu <sup>1</sup> and Vamsi K Yadavalli <sup>1,\*</sup>

<sup>1</sup> Department of Chemical and Life Science Engineering, Virginia Commonwealth University, 601 W Main Street, Richmond, VA 23284, USA

<sup>2</sup> College of Environment and Resources; Chongqing Technology and Business University, No.19 Xuefu Avenue, Nanan district, Chongqing 40067, China

\* Correspondence: vyadavalli@vcu.edu

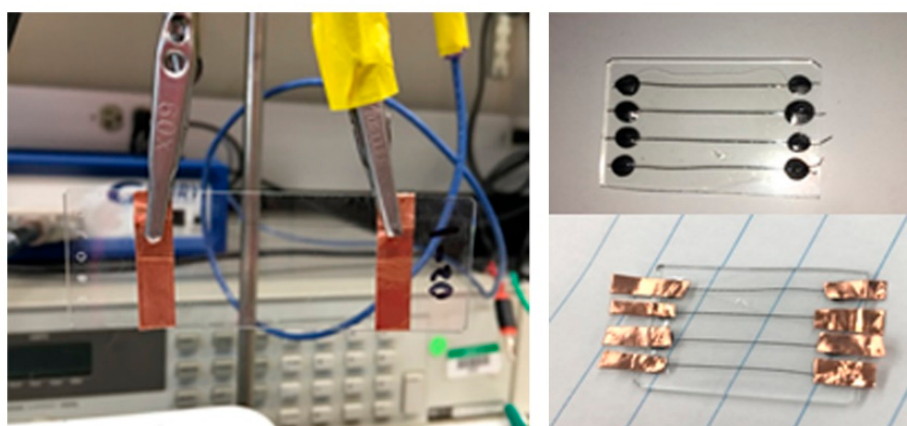

**Figure S1.** Testing procedure to obtain the conductivity for bare and sheathed conducting fibers.

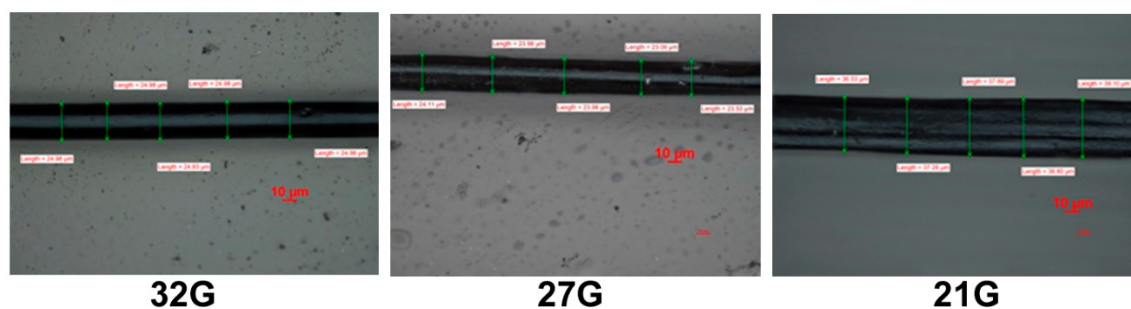

**Figure S2.** PEDOT:PSS fibers spun using different gauge needles (nominal inner diameters of 21G = 514 μm, 27G = 210 μm and 32G = 108 μm).

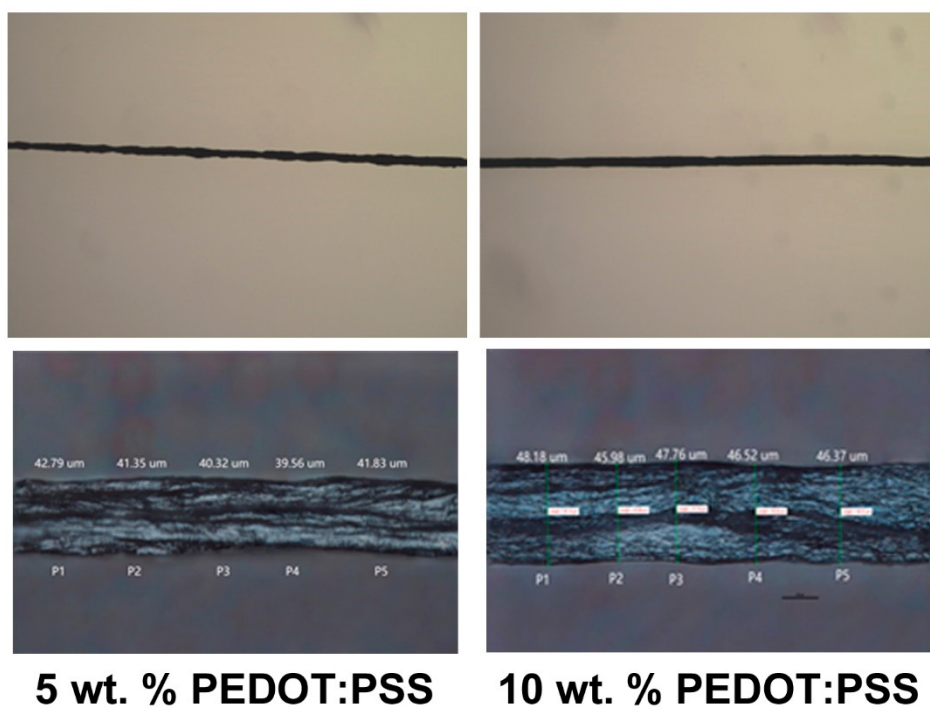

**Figure S3.** PEDOT:PSS fibers spun using different weight % of the dope solution with the same gauge needle.

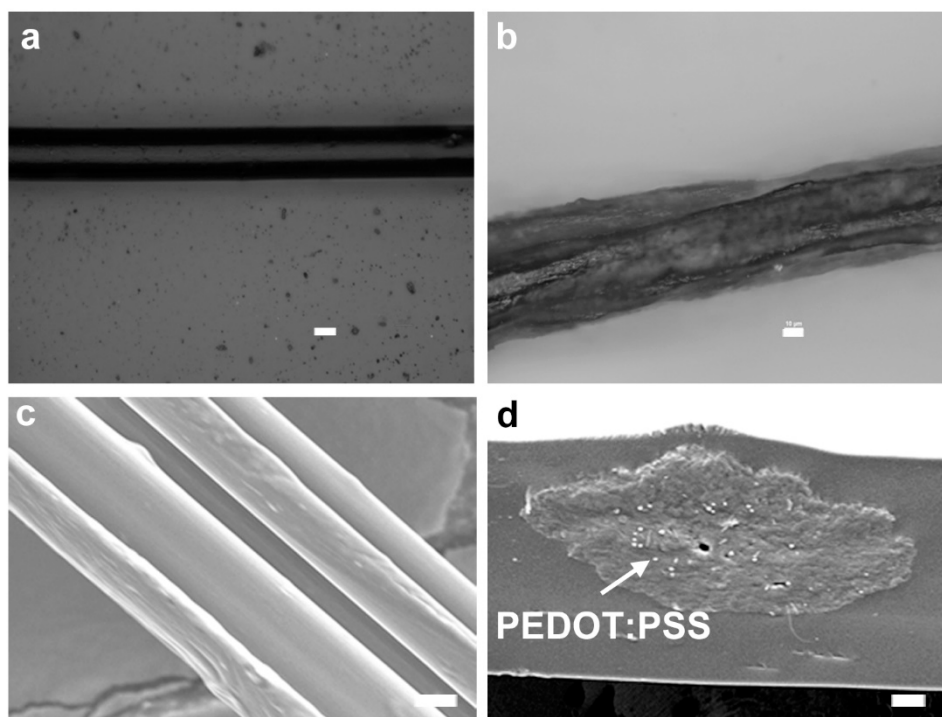

**Figure S4. a, b.** Optical images showing the fibers and the cross-section. **c, d** SEM images. Scale bar = 10 μm on all panels.

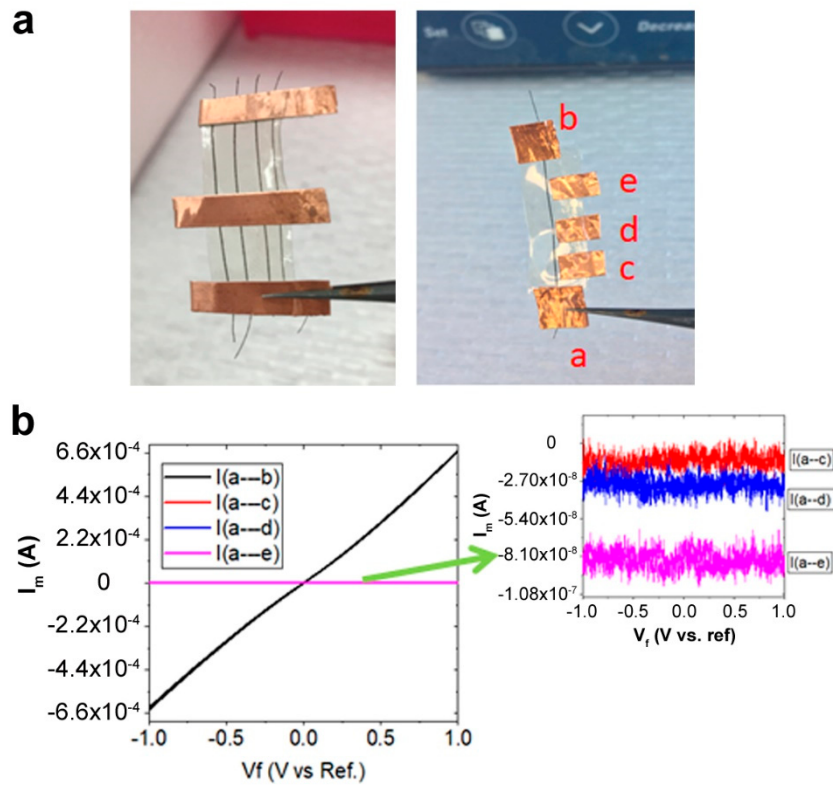

**Figure S5.** Testing the insulation efficacy of the silk fibroin sheath. (a), The conductivity was tested along the sheathed fiber at different points and also across different points. For instance, **a–b** measures the conductivity along the fiber, whereas **a–c** measures the conductivity from the fiber to the insulating surface. Conductive properties are maintained along the fiber, while the surface itself does not show any conductivity or leakage.

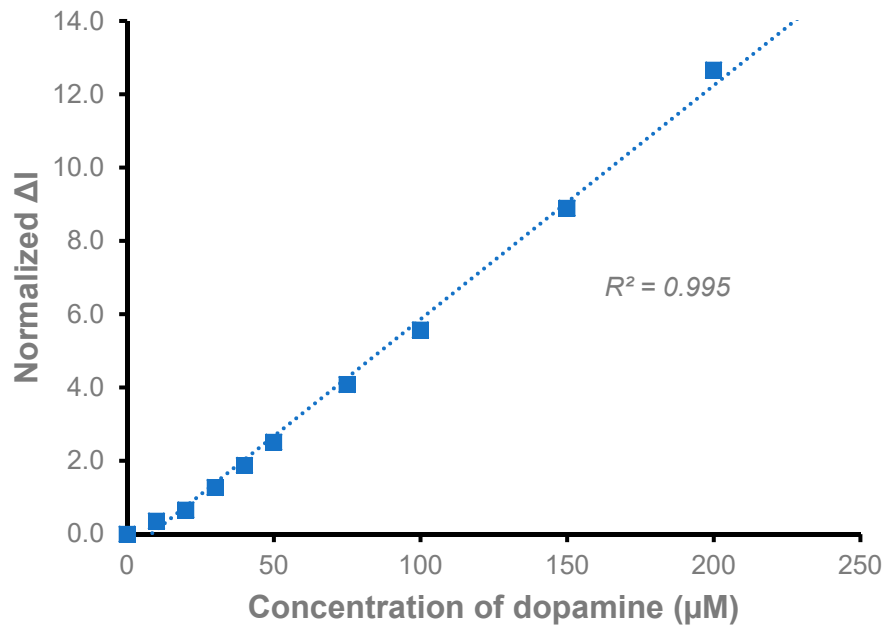

**Figure S6.** Response of the fully integration biosensor device to additions of the neurotransmitter dopamine. A chronoamperometric setup was used to detect the analyte within the physiological range, showing a linear calibration curve.
